# Supplementary material for: Design of functional cationic microgels as conjugation scaffolds
Source: Royal Society of Chemistry journal article supplement (doi:10.1039/c6ra00809g), 2016-01-01
Supplement: c6ra00809g1.pdf [file c6ra00809g1.pdf]

## SUPPORTING INFORMATION

for

# Design of functional cationic microgels as conjugation scaffolds

Purva Kodlekere<sup>a</sup>, Anabel Liyen Cartelle<sup>a</sup>, L. Andrew Lyon<sup>\*,a,b</sup>

<sup>a</sup>School of Chemistry and Biochemistry, Georgia Institute of Technology, Atlanta, Georgia 30332, USA, <sup>b</sup>Schmid College of Science and Technology, Chapman University, Orange, California 92866, United States

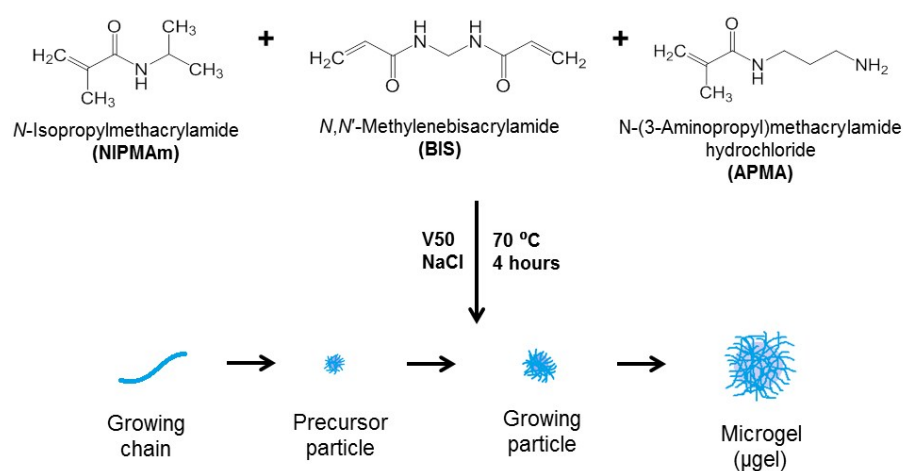

**Scheme S1.** General representation of a one step synthesis of p(NIPMAm-co-APMA) microgels.

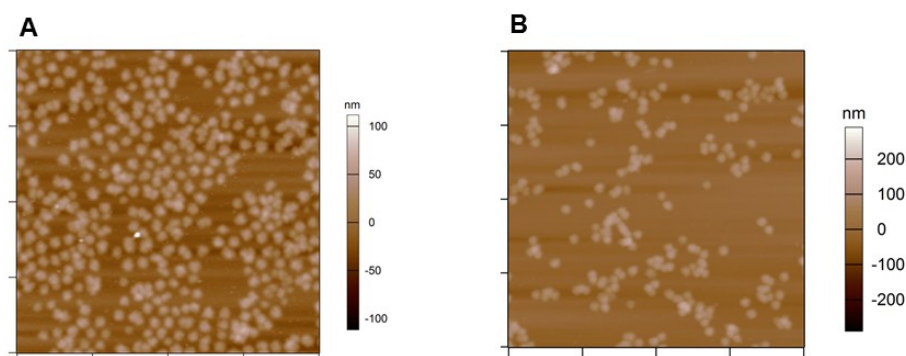

**Figure S1.** AFM height traces of microgels synthesized with [NaCl] (A) and [APS] (B) above a threshold (specific to the synthesis conditions) leads to the formation of misshapen particles (all images are 20μm × 20μm). Microgels were deposited on pre-functionalized glass by centrifugal deposition at 2250 × g for 15 min at 25 °C.

**Table S1.** Effect of increasing V50 concentration on microgel size

| Microgel identity | [NIPMAm] (mol%) | [BIS] (mol%) | [APMA] (mol%) | [APS] (mM) | [V50] (mM) | [NaCl] (mM) | R <sub>H</sub> (nm) at pH 7 |
|-------------------|-----------------|--------------|---------------|------------|------------|-------------|-----------------------------|
| μgel13            | 89              | 2            | 9             | -          | 1.0        | 50          | 195±6                       |
| μgel14            | 89              | 2            | 9             | -          | 0.5        | 50          | 249±14                      |

[Total monomer] = 140 mM, Temperature = 70 °C

DLS measurements performed in phosphate buffer (pH 7, 100 mM ionic strength)

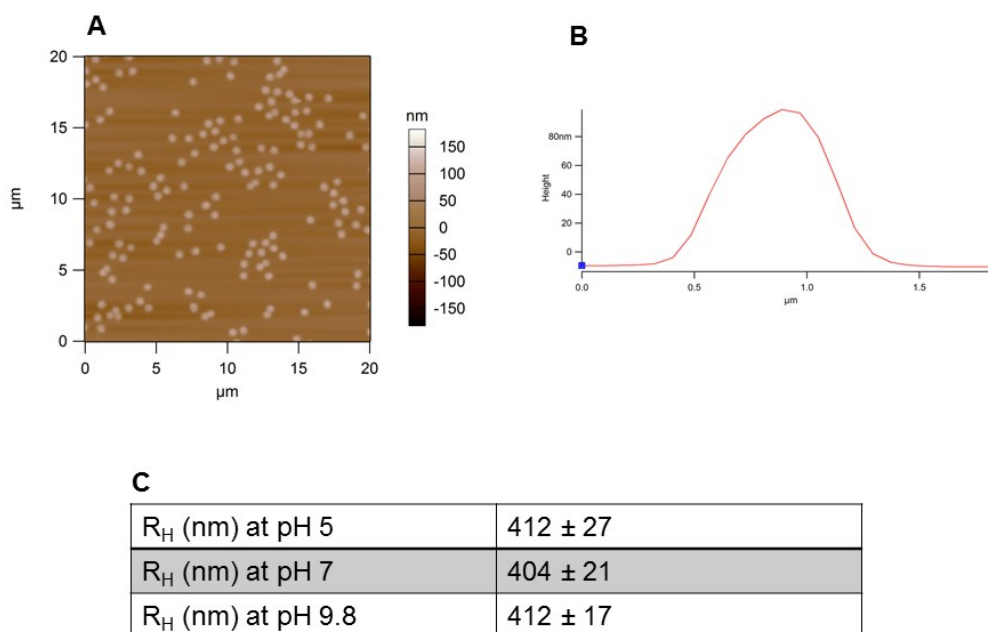

**Figure S2.** AFM height trace of μgelPEG (A), representative height profile (B) and R<sub>H</sub> measured in buffers of different pH values (C). Microgels were deposited on pre-functionalized glass by centrifugal deposition at 2250 × g for 15 min at 25 °C.

Analysis of μgelPEG using the CBQCA assay revealed the number of moles of APMA in the analyzed solution to be  $(1.97 \pm 0.04) \times 10^{-8}$ , with the efficiency of primary amine incorporation being  $39 \pm 1\%$ .

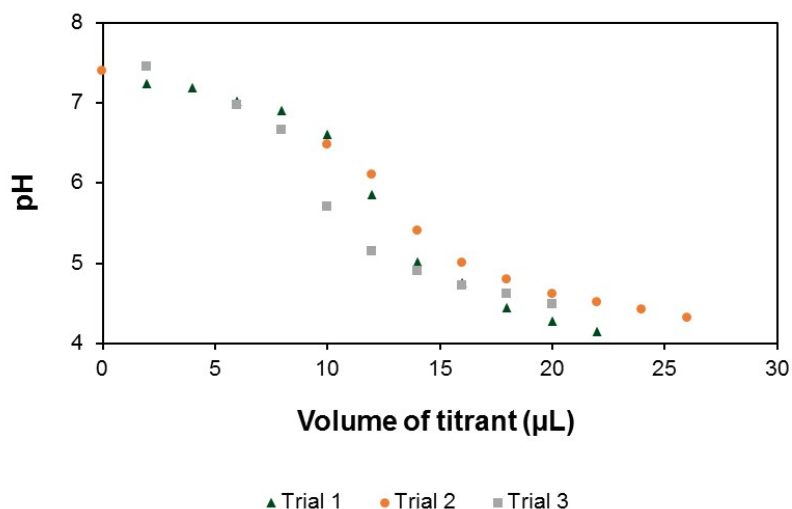

**Figure S3.** pH titration curves of  $\mu$ gel2 solutions using 0.101 M HCl as a titrant for quantitation of primary amine groups.

pH titrations were performed using a Vernier pH Electrode and LabQuest Software (Vernier Software and Technology, LLC., Beaverton, OR). Microgels were diluted to a total concentration of 1 mg/mL in 20 mL distilled, deionized water. Titration was performed against 0.101 M HCl (standardized against 0.099 M  $\text{Na}_2\text{CO}_3$ ) under a  $\text{N}_2$  purge with stirring, at ambient temperature. Measurements of solution pH were made after 300 s equilibration following each addition of titrant.

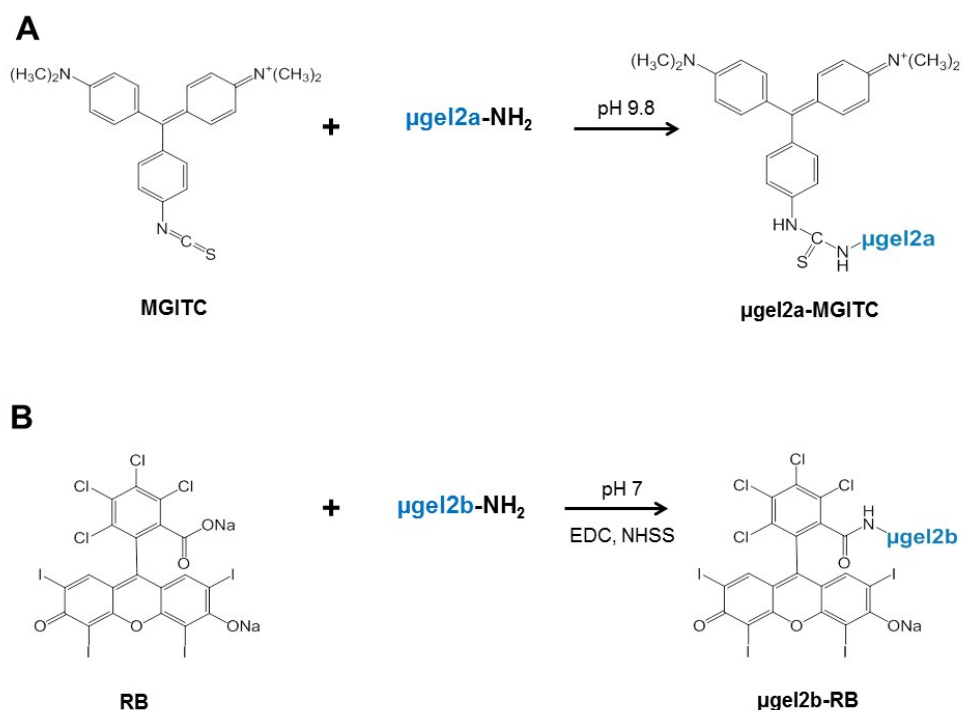

**Scheme S2.** Conjugation reactions utilized for synthesis of  $\mu$ gel2a-MGITC (A) and  $\mu$ gel1-RB,  $\mu$ gel2-RB,  $\mu$ gel2b-RB and  $\mu$ gel6-RB (B) conjugates.

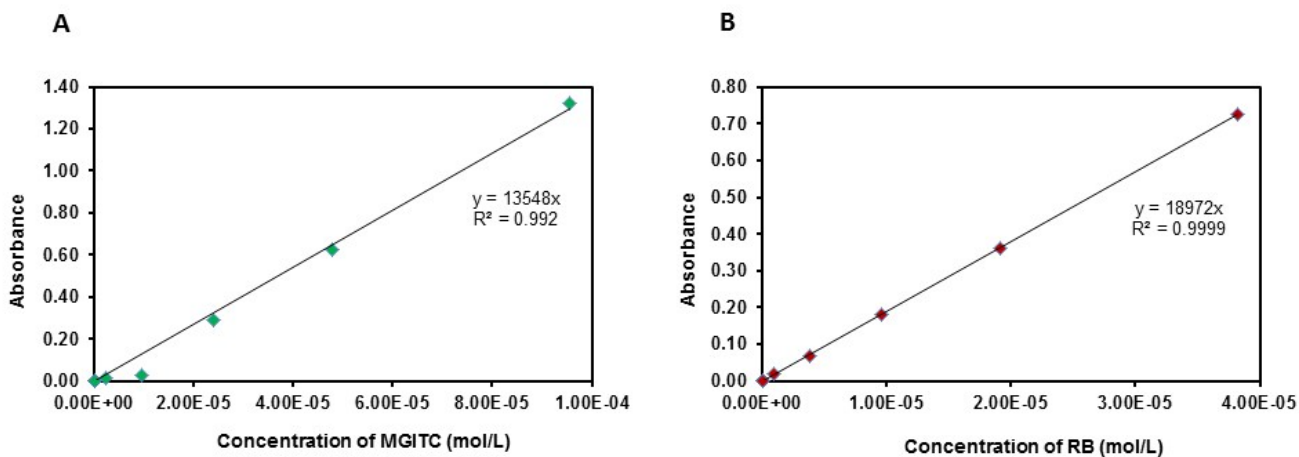

**Figure S4.** Standard curves for absorbance measurements of malachite green isothiocyanate (A) and rose bengal (B) solutions at  $\lambda_{\max}$  values of 625 nm and 540 nm respectively.

**A**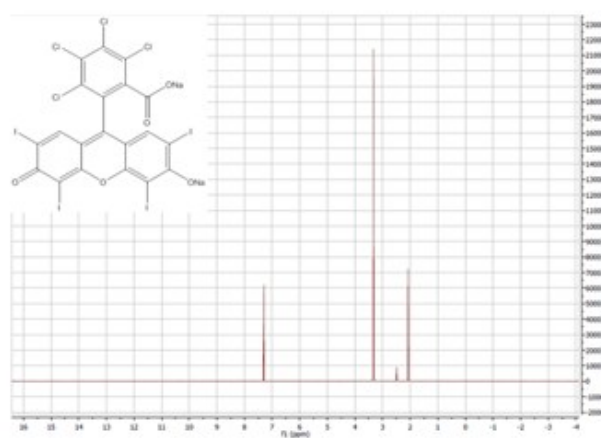**B**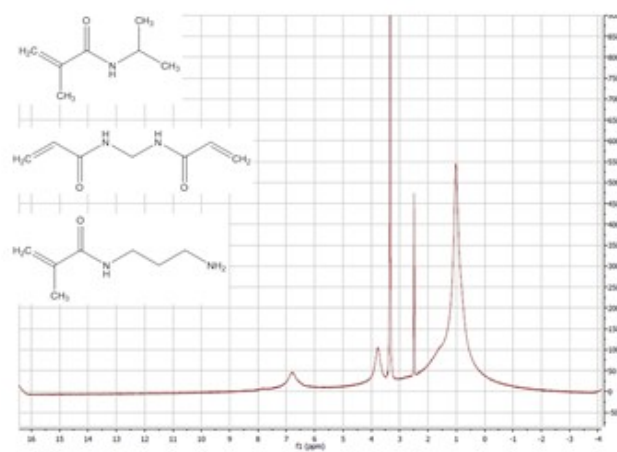**C**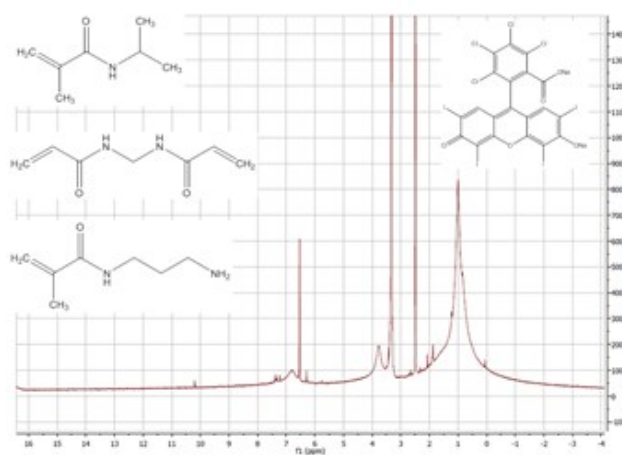

**Figure S5.** 1D  $^1\text{H}$  NMR spectra of RB (A),  $\mu\text{gel2b}$  (B) and  $\mu\text{gel2b-RB}$  (C).

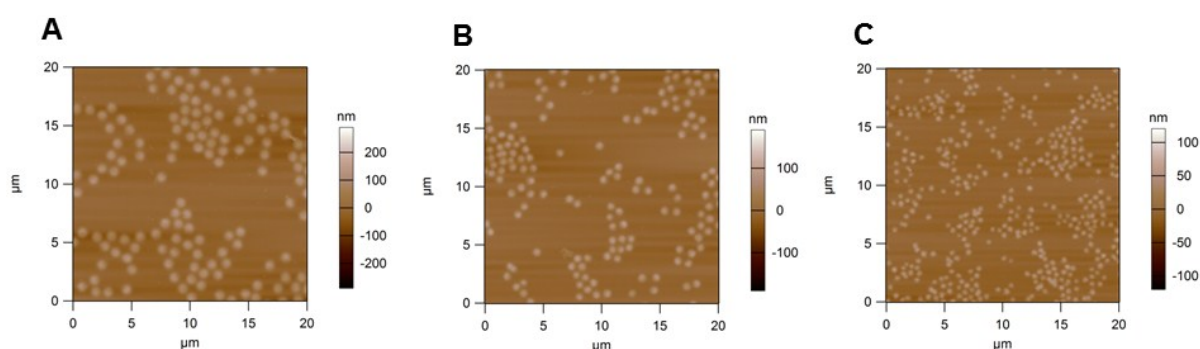

**Figure S6.** AFM height traces of  $\mu$ gel1-RB (A),  $\mu$ gel2-RB (B) and  $\mu$ gel6-RB (C).

**Table S2.** Deswelling data for  $\mu$ gel2b-RB at 37 °C vs. 20 °C

| Temperature (°C) | $R_H$ (nm) |
|------------------|------------|
| 20               | 401±21     |
| 37               | 349±18     |

*DLS performed in phosphate buffer (pH 7, 50 mM ionic strength)*

The average percent deswelling of the microgels is 33.33% by volume, demonstrating that as a result of pNIPMAm having an LCST of ~44 °C, the microgels are not completely deswollen at physiological temperature.

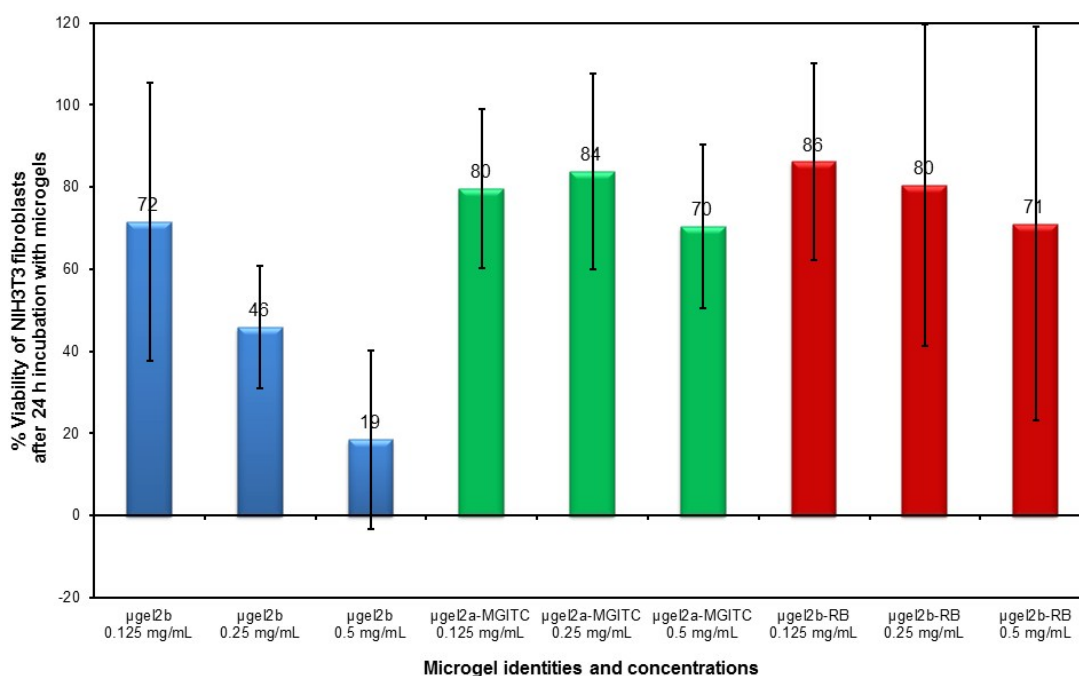

**Figure S7.** Viability data for NIH 3T3 fibroblasts incubated for 24 h with unconjugated microgels (blue bars), microgels conjugated to malachite green (green bars) and microgels conjugated to rose bengal (red bars) (*Values presented as averages of three trials, error bars represent standard deviations of these three values*).
